1 **Title: Insights into mammalian TE diversity via the curation of 248 mammalian genome**  
2 **assemblies**

3 **Authors:** Austin B. Osmanski<sup>1</sup>, Nicole S. Paulat<sup>1</sup>, Jenny Korstian<sup>1</sup>, Jenna R. Grimshaw<sup>1</sup>,  
4 Michaela Halsey<sup>1</sup>, Kevin A.M. Sullivan<sup>1</sup>, Diana D. Moreno-Santillán<sup>1</sup>, Claudia Crookshanks<sup>1</sup>,  
5 Jacquelyn Roberts<sup>1</sup>, Carlos Garcia<sup>1</sup>, Matthew G. Johnson<sup>1</sup>, Llewellyn D. Densmore<sup>1</sup>, Richard D.  
6 Stevens<sup>2</sup>, Zoonomia Consortium, Jeb Rosen<sup>3</sup>, Jessica M. Storer<sup>3</sup>, Robert Hubley<sup>3</sup>, Arian F.A.  
7 Smit<sup>3</sup>, Liliana M. Dávalos<sup>4,5</sup>, Kerstin Lindblad-Toh<sup>6,7</sup>, Elinor K. Karlsson<sup>7,8,9</sup>, David A. Ray<sup>1\*</sup>

8 **Affiliations:**

9 <sup>1</sup>Department of Biological Sciences, Texas Tech University, Lubbock, TX, USA

10 <sup>2</sup>Department of Natural Resources Management and Natural Science Research Laboratory,  
11 Museum of Texas Tech University, Lubbock, TX 79409, USA

12 <sup>3</sup>Institute for Systems Biology, Seattle, WA, USA

13 <sup>4</sup>Department of Ecology & Evolution, Stony Brook University, Stony Brook, NY, USA

14 <sup>5</sup>Consortium for Inter-Disciplinary Environmental Research, Stony Brook University; Stony  
15 Brook, NY, USA

16 <sup>6</sup>Department of Medical Biochemistry and Microbiology, Science for Life Laboratory, Uppsala  
17 University; Uppsala, 751 32, Sweden

18 <sup>7</sup>Broad Institute of MIT and Harvard; Cambridge, MA 02139, USA

19 <sup>8</sup>Program in Bioinformatics and Integrative Biology, UMass Chan Medical School; Worcester,  
20 MA 01605, USA

21 <sup>9</sup>Program in Molecular Medicine, UMass Chan Medical School; Worcester, MA 01605, USA

22

23 \*Correspondence: david.4.ray@gmail.com

24 **Abstract:**

25 We examined transposable element (TE) content of 248 placental mammal genome  
26 assemblies, the largest *de novo* TE curation effort in eukaryotes to date. We find that while  
27 mammals resemble one another in total TE content and diversity, they show substantial  
28 differences with regard to recent TE accumulation. This includes multiple recent expansion and  
29 quiescence events across the mammalian tree. Young TEs, particularly LINES, drive increases in  
30 genome size while DNA transposons are associated with smaller genomes. Mammals tend to

31 accumulate only a few types of TE at any given time, with one TE type dominating. We also  
32 found association between dietary habit and the presence of DNA transposon invasions. These  
33 detailed annotations will serve as a benchmark for future comparative TE analyses among  
34 placental mammals.

35 **One-Sentence Summary:** A *de novo* assessment of TE content in 248 mammals finds  
36 informative trends in mammalian genome evolution.

37 **Main Text:**

38 Barbara McClintock became a scientific pioneer in the field of genomics with her Nobel  
39 Prize winning discovery of transposable elements (TEs), DNA sequences that can mobilize  
40 themselves in host genomes (1). A ubiquitous component of nearly all eukaryotes (2), TEs are  
41 typically classified into two major groups based on their mobilization mechanism (3). Class I  
42 elements, also known as retrotransposons, utilize an RNA intermediate during transposition  
43 allowing replication throughout the genome in a copy-&-paste style of mobility (4). Class I  
44 elements can be sorted further into three subcategories: Short INterspersed Elements (SINEs),  
45 Long INterspersed Elements (LINEs), and LTR-retrotransposons (5). SINEs are non-  
46 autonomous elements and depend on the presence of functional LINE elements, which contain  
47 anywhere from 1-3 open reading frames encoding the necessary proteins for mobilization. Class  
48 II elements, also known as DNA transposons, employ a DNA intermediate and can also be  
49 subdivided. TIR-like DNA transposons such as hATs, piggyBacs, and TcMariner transposons  
50 utilize a cut-&-paste mechanism by using transposase enzymes to catalyze the TE's relocation  
51 (6). Helitrons, a second subcategory of Class II elements utilize a rolling-circle mechanism (7).  
52 The final subcategory of known DNA transposons are Maverick elements, which are thought to

53 be derived from viruses as they have homologous genes coding for DNA polymerase and  
54 retroviral-like integrase (8).

55 An increase in activity from either class of elements can lead to drastic alterations in  
56 genome architecture (9). A variety of changes, including insertions, duplications, translocations,  
57 deletions, and inversions can result from TE mobilization and accumulation (9). For instance, the  
58 *AMAC1* (acyl-malonyl condensing enzyme 1) gene, coding for a protein essential for breaking  
59 down phytanic acid from meat and dairy foods, has undergone multiple recent gene duplications  
60 mediated by SVA retrotransposons in the human genome (10, 11). In addition to these structural  
61 variants, the proliferative mechanisms of TE mobilization tend to cause eukaryotic genome sizes  
62 to linearly correlate with TE abundance (2).

63 Increasing evidence indicates that TE-derived sequences have substantially influenced  
64 the evolutionary histories of the organisms they occupy, even contributing to major evolutionary  
65 innovations benefitting host organisms. Examples include recent TE insertions into genes  
66 involved with insecticide resistance of the cotton bollworm (12); the rapid adaptation leading to  
67 melanistic phenotypes of peppered moths in the soot ridden environment of British  
68 industrialization (13); and the myriad of endogenous retroviruses that have contributed novel  
69 regulatory functions to the development and evolution of the mammalian placenta (9, 14). The  
70 overwhelming majority of TE insertions, however, result in selectively neutral alterations in  
71 genome architecture, often showing no perceptible effect on host fitness (15). That being said,  
72 deleterious insertions occur and impairments in gene function are possible outcomes of TE  
73 mobilization which can lead to a wide variety of genetic diseases (9).

74 As a result, numerous genomic TE defense mechanisms have evolved to combat TE  
75 activity by either regulating TE transcription or by targeting their intermediates to prevent

76 integration into the genome (3). These defense mechanisms explain, in part and in some  
77 organisms, why few TE families retain the ability to mobilize over long periods of evolutionary  
78 time (16). For example, among the ~868,000 L1 insertions in the human genome, few are  
79 thought to be retrotransposition-competent and many of these exhibit cell-type specific  
80 mobilization profiles (3, 17). Alternative to or in conjunction with the aforementioned scenario  
81 of low numbers of functionally mobile TEs among some categories of elements, genomic drift  
82 and the corresponding effects of fixation events among bottlenecked populations gives rise to  
83 another explanation for varying levels of TE accumulation in different genome assemblies (18).

84 All these facets suggest that determining TE dynamics is key to understanding how  
85 genomes evolve and function. Thus, TE curation and annotation is one of the most important  
86 initial investigative steps in any description of a *de novo* genome assembly. Unfortunately, this  
87 step is often relegated to an afterthought rather than performing a time-intensive *de novo* TE  
88 curation effort (19). As a result, many genome assemblies are misunderstood from a TE  
89 perspective (19). As the scientific community improves genome sequencing and assembly, the  
90 lack of thorough and accurate TE annotation promises to become a major problem, especially in  
91 the face of the number of large-scale genome sequencing initiatives now underway (20-24).

92 The Zoonomia project, described in (24), represents an opportunity to gain substantial  
93 knowledge of the diversity of TEs in an important vertebrate clade, Mammalia. Here, we fill this  
94 knowledge gap by providing complete, *de novo* TE annotations of 248 Zoonomia mammalian  
95 genome assemblies using homology, *de novo*, and manual annotation approaches.

## 96 **Results:**

### 97 *General TE trends among mammals*

98 RepeatModeler (25), a *de novo* TE discovery tools, was used to examine 248 mammalian  
99 genome assemblies yielding 25,025 putative TE starting queries. After initial curation and  
100 elimination of duplicates, an iterative curation process consisting of between 1 and 19 rounds of  
101 detailed curation (19), depending on the species (see Methods), yielded a library consisting of  
102 8,263 novel consensus sequences. That library was combined with known TEs to create a  
103 comprehensive mammalian TE library. This library, consisting of 25,676 consensus sequences,  
104 was used to mask all assemblies. The dynamics of TE biology and intricacies of TE detection  
105 lend themselves to a degree of false detection. For example, some TE families are chimeras of  
106 multiple elements or they may contain similar core sequence components. To evaluate the  
107 potential for false positives, we took advantage of an idiosyncrasy of TE biology in bats. A  
108 family of bats, the Vespertilionidae, is, to our knowledge the sole mammalian family to have  
109 incorporated a type of rolling circle transposon, Helitrons, into their TE repertoire (3). True  
110 Helitrons in mammals have not been detected outside of Vespertilionidae. Thus, any Helitrons  
111 detected outside of vesper bats, would likely be a false positive. RepeatMasker (26) detected  
112 Helitrons in non-vesper mammals at a rate of  $0.0013 \pm 0.0019$ , suggesting a low false positive  
113 rate.

114 Previous work has suggested that the largest single classifiable component of a typical  
115 mammalian genome is TEs (27) and our data (Fig. 1) corroborate this. As noted previously by  
116 Elliott & Gregory in 2015 (2), genome size linearly correlates with the percentage of TE content  
117 within a genome and this is again supported (Fig. 1, Table S1). Overall, TE content in each of the  
118 examined species ranges from a low of 27.6% in the star-nosed mole (*Condylura cristata*) to  
119 74.5% in the armadillo (*Oryzomys azer*) (Table S2, Fig. 1), with a distinct tendency to cluster in  
120 the middle of that range (average TE proportion: 45.6%, average genome size: 2.67Gb). The

121 hazel dormouse (*Muscardinus avellanarius*) and Brazilian guinea pig (*Cavia aperea*) represent  
122 the extremes of this middle cluster with 65.8% and 28.1% total TE content, respectively.  
123 Assembly quality may impact the accuracy of TE annotation, but we could find no statistically  
124 significant trend among taxa. For example, lower quality assemblies as measured by N50 or  
125 BUSCO completeness did not yield lower or higher rates of observed TE accumulation (Fig. S1  
126 and S2).

### 127 ***TE variation among mammals***

128 When examining TE content from all categories across the mammalian tree, we find some  
129 general trends. For example, SINEs and LTR retrotransposons are more prevalent in  
130 Euarchontoglires while LINEs dominate most other lineages, especially the bovids (Fig. 2).  
131 However, we find placental mammals are generally similar with regard to overall TE  
132 proportions, reflecting the tendency to retain older insertions that occurred in the common  
133 ancestor of mammals. LINEs and SINEs always make up most TE abundance both in copy  
134 number and in total genomic percentage. LINEs occupy between 8.2% and 52.8% of the  
135 genomes examined, averaging 22.6%. SINEs occupy on average 10.5% of the mammalian  
136 genome (range 0.4%-32.1%) (Table S3) while LTR retrotransposons, DNA transposons, and  
137 rolling-circle transposons (RC) are substantially rarer; 7.8% (range 2.0%-17.8%), 3.5% (range  
138 0.5%-8.4%), and 0.5% (range 0.01%-19.7%), respectively.

139 Examination of younger insertions, those with divergences averaging <4% from their  
140 respective consensus, provides a picture of these genomes that is more dynamic, revealing  
141 substantial differences in accumulation from each category of TE (Table S4). Some lineages,  
142 such as the pteropodid bats (*Pteropus alecto*, *P. vampyrus*, *Eidolon helvum*, and *Rousettus*  
143 *aegyptiacus* in Fig. 2), exhibit essentially no recent accumulation by any TE category while

144 others have experienced massive expansions in one or more categories. The aardvark  
145 (*Orycteropus afer*) and musk deer (*Moschus moschus*) for instance, show substantial LINE  
146 accumulation over the past ~20 million years.

147 To examine these trends more closely, we conducted a redundancy analysis (RDA) for  
148 both orders and families to identify the major axes of variation in TE composition that were  
149 related to either order or family affiliation of taxa (Fig. 3). This analysis suggests a strong  
150 phylogenetic component to variation in TE composition among clades at the levels of order and  
151 family. Eleven orders of mammals were significantly correlated with at least one of the two axes  
152 and these orders were quite variable in terms of association with different TE types. The first two  
153 major axes of variation in TE accumulation in analyses examining orders accounted for  
154 approximately 27.2% of the variation and this was highly significant ( $P < 0.001$ ). The first major  
155 axis was positively related to the number of young TEs generally, and to young LINEs, LTRs,  
156 and SINEs, which are all obligately replicative. Unsurprisingly given this characteristic, genome  
157 size was also positively correlated with this axis. This axis was negatively related to young DNA  
158 transposons and young rolling circle transposons. The second major axis of TE composition  
159 related to ordinal affiliation was positively related to the number of young DNA transposons,  
160 rolling circle transposons, LINEs and young TEs more generally, but negatively related to young  
161 LTRs, SINEs, and to genome size.

162 Similar associations are seen at the family level. Families of mammals accounted for  
163 approximately 49.9% of variation in TE composition, and this was highly significant (Fig. 3;  $P <$   
164 0.001). As with orders, the first major axis of variation was positively related to the same  
165 categories of TE and to genome size. Correlations of young DNA transposons and young rolling  
166 circle TEs were weaker than for orders, likely due to the lineage specificity of those element

167 types (see below), while positive associations of all other TE types were stronger. The second  
168 major axis was positively related to the number of young DNA transposons, rolling circle  
169 transposons, LINEs, and young TEs generally and negatively related to genome size. Fourteen  
170 families of mammals were significantly correlated with at least one of these two axes and these  
171 families were variable in terms of association with different TE types.

## 172 *TE diversity*

173 An increasingly useful avenue of inquiry among whole-genome TE analyses draws from  
174 community ecology (28). Of interest is the application of community diversity measures  
175 rendered on a genomic scale (29). We followed these lines o  
176 f inquiry by investigating the diversity of recent TEs in each genome by calculating two diversity  
177 indices and applying them to our data, Shannon diversity index (30) and Pielou's *J* (31).  
178 Shannon diversity is a measure of overall diversity in a population of objects while Pielou's *J*  
179 measures evenness by incorporating the relative numbers of each object, in this case, TE types  
180 (Table S5). Species with the highest diversity values include bats and rodents. Bat TE diversity  
181 was driven primarily by recent expansion of DNA transposons among Craseonycteridae,  
182 Vespertilionidae, Hipposideridae, Rhinolophidae, and Mollossidae and recent accumulation of  
183 both DNA transposons and rolling circle transposons in Vespertilionidae (Fig. 4).

184 In rodents, higher diversity among recently inserted TEs was driven by accumulations in  
185 LTR retrotransposons, which made up 10-53% of recent TE accumulation. The highest rate of  
186 recent LTR accumulation among the rodents was seen in members of Cricetidae and *Cricetomys*  
187 *gambianus*.



188 To investigate general trends in diversity index values in relation to TE accumulation  
189 patterns, we plotted values from recently deposited TEs vs. each diversity index (Fig. 5).  
190 Hierarchical Bayesian analyses indicate that both Shannon diversity and Pielou's  $J$  exhibit  
191 significant negative relationships with increasing recent TE content; Shannon  $H$  (Fig. 5, Table  
192 S6) and Pielou's  $J$  (Fig. 5, Table S7, Fig. S3). Thus, the downward trend in Pielou's  $J$  suggests  
193 that mammalian genomes tend to accumulate individual TE types at any given period rather than  
194 multiple TE types accumulating simultaneously. This is exemplified in the armadillo, where  
195 LINEs are currently dominating the recently active mobilome while SINEs are the major recent  
196 contributor to the greater cane rat (*Thryonomys swinderianus*) genome (Fig. 2). However, clades  
197 of bats with recent DNA accumulation tend to refute this pattern.

#### 198 ***DNA transposons and diet***

199 The lineage specificity of the DNA transposon diversity described above suggests  
200 horizontal transfer (HT) as a potential source of novel TE invasions in certain mammalian  
201 genomes. To investigate patterns that may explain how such HT events may occur, we examined  
202 the potential for life history to play a role. We hypothesized that differences in diet may allow  
203 select species to come in contact with vectors for TEs (14, 32), which increase the likelihood of  
204 successful invasion of mammalian genomes. DNA transposon-rich food sources such as many  
205 arthropods, and non-mammalian vertebrates may offer greater potential for HT to some species  
206 compared to those that eat plants. Hierarchical Bayesian analyses indicate that carnivorous  
207 mammals tend to accumulate more recent DNA transposons in their genomes than non-  
208 carnivores (Fig. 6A; Table S8). This pattern is best exemplified in the cetartiodactyls (Fig. 6B).  
209 Recent DNA transposon accumulation is seen on average 20x more among the cetaceans than  
210 other artiodactyls. Carnivorous bats, however, did not have statistically higher accumulations of

211 recent DNA transposons than herbivorous bats (Fig. 6C). Our datasets of primates and rodents  
212 did not reveal any statistical difference of recent DNA transposon accumulation between  
213 herbivores and omnivores (Fig. 6D-E).

## 214 **Discussion**

215       As our ability to generate high quality genome assemblies in rapid succession improves,  
216 the need to curate TEs in those assemblies will only increase. Toward that end, we performed a  
217 *de novo* assessment of the TE content of 248 mammal genome assemblies in what is, to our  
218 knowledge, the largest comprehensive TE curation effort to date. This represents an increase of  
219 ~58% compared to known mammalian TEs in RepBase as of 2019, when we began. Given the  
220 numerous impacts that TEs are known to have at multiple levels of genome organization and  
221 function, this increased knowledge will serve as a particularly valuable resource for anyone  
222 interested in mammalian genomics and evolution. The full set of TE consensus sequences is  
223 available for download from the Dfam (33) database.

224       Previous work has noted that genome size among mammals is relatively constrained (34)  
225 and this work does not contradict that observation. Despite this constraint, our effort notes that  
226 there is substantial variation in rates of accumulation in the recent mammalian past. Indeed, we  
227 found that there is substantial diversity in TE accumulation patterns among mammals, suggesting  
228 distinct TE-induced pressures on those genomes over evolutionary time and, likely, distinct  
229 differences in the ability of eutherians to defend their genomes against TEs. These differences  
230 represent an excellent opportunity for future researchers to investigate how TE defenses evolve  
231 and respond to differing TE loads.

232 Another avenue of such research is to further investigate TE accumulation through the  
233 lens of ecology and environment, an idea that has been discussed previously (14). Our data  
234 demonstrate that carnivorous lineages tend to harbor an excess of recently accumulated DNA  
235 transposons when compared to herbivorous taxa. The tendency of meat-eating mammals to have  
236 more recent DNA transposon accumulation as compared to their non-carnivorous counterparts  
237 suggests diet may play a significant role in a genome's likelihood of experiencing HT from Class  
238 II TEs. This scenario is supported in part by a recent analysis of HT in predator-prey pairs and  
239 their shared parasites (32). Nevertheless, this finding is not uniform across mammalian orders  
240 and those varying patterns may reflect defenses against TE invasion (3), less availability of TEs  
241 in order-specific dietary items, or some combination of both.

242 Investigating mammalian TEs through the ecological lens also suggests that single TE  
243 types tend to dominate the mobilome during any given period (Fig. 5). This scenario is consistent  
244 with our current understanding of TE defense mechanisms. The current model of PIWI-mediated  
245 TE defense suggests that a new TE may invade or arise in a genome and enjoy a period of  
246 relatively unfettered mobilization. Eventually, the piRNA defenses generate an effective  
247 response and dampen the new TE's impacts (16, 35, 36).

248 With regard to the prevalence of HT of DNA transposons in carnivores, our data support  
249 the hypothesis that the prevalence of HT of DNA transposons may be a consequence of the  
250 similar cellular environments of predator and prey and their necessarily shared environments and  
251 frequent interactions. Recent research has demonstrated the role that viruses and blood-feeding  
252 arthropods play in facilitating HT (14, 32). Frequent interactions would further facilitate HT by  
253 bringing such vectors into contact with both predator and prey. The similar cellular environments  
254 among animals (as opposed to mammals with plant-based diets) would further encourage the

255 ready transfer of DNA transposons, which are already more amenable to HT due to their  
256 relatively weak dependence on a host's cellular machinery to mobilize (37).

257 In conclusion, the annotation data provided here is essential for answering future  
258 questions related to emerging hypotheses around speciation such as the TE-Thrust Hypothesis,  
259 the Epi-Transposon Hypotheses, or the Carrier SubPopulation Hypothesis (3, 38). As  
260 anthropogenic change exacerbates the decline in effective population size for many of the  
261 species in our dataset, transposable elements might be the reservoir of genomic mutagens that  
262 future populations or species rely on.

## 263 **Materials and Methods**

### 264 Generating the mammalian TE library

265  
266 A total of 248 genome assemblies of placental mammals were initially presented for analysis  
267 (table S2). For six species, higher quality assemblies were available via Bat1k, a similar, large scale  
268 genome sequencing and assembly effort (21). In those cases, we replaced the Zoonomia assembly with  
269 the higher quality version. Some assemblies were not used in the development of our final mammalian  
270 TE library due to one or more of the following reasons: 1) the assembly exhibited a low N50 value  
271 (<20,000) resulting in short contigs which are unsuitable for identifying longer TEs, 2) multiple artifacts  
272 of assembly error were observed at TE sites which yielded implausible consensus sequences, 3) a  
273 thorough species-specific TE annotation had already been performed and is available from RepBase  
274 (Genetic Information Research Institute) (39), previous work from our own laboratory, or work  
275 conducted by a collaborator. This left us with 205 species as substrates for TE curation (table S2).

276 Mammalian genomes have only a minimal tendency to remove older TE insertions from the  
277 genome (40). Thus, the majority of older TE families that mobilized in the common ancestor or early in  
278 the mammalian diversification were likely already characterized through efforts that focused on any of

279 several model organisms such as human, mouse, rat, pig, dog, cat, and horse (41-47). To avoid wasted  
280 effort on re-curation of these shared and previously described TEs, we focused our manual curation  
281 efforts on identifying newer putative TEs that underwent relatively recent accumulation. We defined  
282 such ‘young’ insertions as TEs with sequences with K2P genetic distances less than 4% when compared  
283 to their respective consensus. For temporal orientation, a kimura divergence of 4% approximates 20mya  
284 or less since insertion, based on a general mammalian neutral mutation rate of  $2.2 \times 10^{-9}$  (48). The use of  
285 a general mutation rate allowed for consistency among K2P values in analyses, however it limits the  
286 accuracy of species-specific temporal estimations due to varying neutral mutation rates among placental  
287 mammals. Thus, results with divergence values of less than 4% are considered “young” and do not  
288 provide exact dates. This approach yielded mostly lineage specific TEs, many of which were yet to be  
289 described but some previously identified and shared elements were occasionally encountered (i.e. the  
290 Tigger family of Tc Mariner transposons and others), suggesting that we did not miss older but  
291 unidentified elements. Custom scripts associated with the identification of younger elements are  
292 available on zenodo (49).

293 For details of the curation process, see previous work from (19). Briefly, for each iteration of  
294 manual TE curation, new consensus sequences were generated from the 50 BLAST hits which shared the  
295 highest sequence identity to the consensus used in our BLAST query for that iteration. Custom pipelines  
296 accomplished this by aligning BLAST hits with MUSCLE (50), trimming alignments with trimAl (-gt 0.6 -  
297 cons 60) (51), and estimating a consensus sequence with EBMOSS (cons -plurality 3 -identity 3) (52).  
298 Files which resulted in fewer than 10 BLAST hits were discarded. To consider a consensus sequence  
299 ‘complete,’ the alignment needed to exhibit a pattern of random sequence at both the 5’ and 3’ ends, or  
300 after extension to a length of 7kb or greater, whichever came first.

301 Because the ubiquitous LINE-1 can introduce copies of any transcript into the genome,  
302 mammalian genomes have an unusually high number of processed pseudogenes (53-55). Including these

303 in a repeat database would result in annotation of functional genes as TE copies. Comparisons with  
304 protein (domain) databases (<https://www.ncbi.nlm.nih.gov/protein/>,  
305 <https://useast.ensembl.org/index.html>) we found and removed 152 such entries, most characterized by  
306 a poly A tail. Small structural RNAs often occur in higher copy numbers partially because they are also  
307 substrates of LINE1 (56), and a further 49 entries were dismissed as models created from their genes  
308 and pseudogenes.

309 Two or three copies of interspersed repeats with very high copy numbers, usually but not  
310 exclusively SINEs, can often be found in tandem clusters. This occurs more than by chance do to target  
311 site preferences. For example, LINE-1 dependent SINEs insert in A-rich DNA, and such sites are  
312 introduced by their own poly A tails (57). These artifacts are often identified by de novo repeat finders  
313 but can be recognized when studying the seed alignments. Models will also have been built for the  
314 individual units and many copies will end at the joining region between the units, the joining region is  
315 more variable than the rest of the model. Over 210 models were such artifacts and eliminated.

316 Because in mammals the majority of LTR elements are represented by solo LTRs (58), Dfam (33)  
317 and Repbase (39) harbor separate models for the LTRs and the internal sequences. De novo repeat-  
318 finders like RepeatModeler often produce full elements or reconstruct a (partial) LTR and a fragment of  
319 the internal sequence. We split these models into their components, based on homology to well-defined  
320 LTRs and the presence of tRNA primer binding sites.

321 The combined original library contained several redundant models. Recognizing that models  
322 represent (fragments of) the same TE is complicated by incorrect base calls, indels, overextension, and  
323 incompleteness of the reconstruction as well as by the evolution of class I TEs in the genome: copies  
324 created at different evolutionary times or from different descendants of the ancestral TE (sometimes  
325 subtly) differ. A solid test for redundancy is to match the genome to all related models simultaneously

326 and find that some models are always outcompeted by others or that models converge to the same  
327 consensus sequence. This could only be accomplished once the database was finalized, so we applied  
328 arbitrary but informed cutoffs. Before comparison to each other the low complexity tails of SINEs and  
329 LINEs were set to a standard length and short overextensions were trimmed, based on the expected  
330 signatures of terminal bases or target site duplications. Differences between models at possible (highly  
331 mutagenic) CpG sites were ignored. Dependent on class and age, elements were removed with  
332 alignment scores against another model with a more complete sequence or a better seed alignment that  
333 were between 90-95% of the score against itself. Partially overlapping fragments of potentially the same  
334 TE were not addressed at this point.

335         We eliminated duplicated entries only when they were built from the same assembly. The same  
336 TE can be reconstructed from the genomes of different species if it was active before their speciation  
337 time, but with our current approach we could not estimate if a repeat was shared or lineage-specific and  
338 merely similar. Thus, in Dfam (33) each of the models of this study currently is associated with only one  
339 species and will not be matched when a same model is present in another species library.

340         To confirm the TE type, each sequence in the library was subjected to a custom pipeline (49) which  
341 used: blastx to confirm the presence of known ORFs in autonomous elements, RepBase (39) to identify  
342 known elements, and TEclass (59) to predict the TE type. We also used structural criteria for categorizing  
343 TEs. DNA transposons were identified as elements with visible terminal inverted repeats. Rolling circle  
344 transposons were required to have identifiable ACTAG at one end. Putative SINEs were inspected for a  
345 repetitive tail as well as A and B boxes. SINEs also were classified by comparison to a database of SINE  
346 modules(33): 800 small RNA class III promoter regions, 150 core regions and 5500 3' ends of LINE  
347 elements (which SINEs often share). LTR retrotransposons and solo LTRs were required to have  
348 recognizable hallmarks, such as: TG, TGT, or TGTT at their 5' and the inverse at the 3' ends, and the  
349 presence of a polyadenylation signal. LTR classes could often be assigned by (indirect) sequence

350 homology to a coding internal sequence, when present. After this process, 8263 models and their seed  
351 alignments were submitted to Dfam (33).

352           Once the final mammalian TE library was created, we used RepeatMasker-4.1.0 to mask the  
353 genome assemblies. Postprocessing of output was performed using the rm2bed.py utility included with  
354 RepeatMasker, which merges overlapping hits and converts the output to bed format.

355  
356  
357  
358  
359

### Plotting TE variation using ordination

360           To characterize the major axes of variation of young TE accumulation among taxa we conducted  
361 a redundancy analysis for both orders and families. In these analyses, the number of base pairs  
362 attributed to of each TE Type as well as genome size for each taxon (order or family) was the dependent  
363 matrix and dummy variables (60) assigning a species to either family or order was the independent  
364 matrix. Redundancy is a multivariate regression that aims to examine the amount of variation and its  
365 statistical significance in the dependent matrix that can be accounted for by the independent matrix.  
366 Associations among variables were quantified based on a correlation matrix and significance was  
367 determined based on 9999 permutations of the original datasets. Redundancy analyses were  
368 performed in Canoco version 5 (61).

369  
370  
371  
372

### Test for association between TE proportions and assembly size, two diversity indices, and diets

373           The three objectives of these analyses included: 1) quantifying the association, if any, between  
374 the total TE proportion in genome and assembly size; 2) estimating the difference in proportions of  
375 recently accumulated DNA transposons within a genome among species with different diets; 3) and  
376 quantifying the association, if any, between recent TE proportion in a genome and two diversity indices.



377 Diversity indices

378

379 An increasingly useful avenue for characterizing TE accumulation draws on community ecology

380 (28). Of particular interest is the application of community diversity measures rendered on a genomic

381 scale (29). We followed these lines of inquiry by investigating recent TE diversity within each genome of

382 our dataset by calculating the Shannon Diversity Index of TE classes. Focusing on recently inserted TEs,

383 we summed the bases that were attributed to TEs with K2P values less than 4%. We then generated the

384 proportions ( $p_i$ ) for each TE class attributed to the overall base pair total of recently inserted TEs. To

385 calculate the Shannon Diversity Index,  $H$ , per the equation.

386 
$$H = - \sum_{i=1}^k (p_i) \log(p_i)$$

387 To calculate the evenness of recent TE accumulation among the 5 main categories of TEs, we

388 employed the ecological metric, Pielou's  $J$ , a measure of species evenness, where  $S$  was equal to the

389 total number of recent TE hits found within an assembly.

390 
$$J = \frac{H}{\ln(S)}$$

391 Dietary data

392 We gathered diet classification from The Animal Diversity Web ([animaldiversity.org](http://animaldiversity.org)) for 178

393 available mammals on the public database (table S8). The young DNA transposon dataset was then

394 compared against three diet types: carnivore, herbivore, and omnivore.

395

396

397 Hierarchical Bayesian analyses

398 A hierarchical Bayesian approach was adopted to simultaneously estimate the species-specific  
399 structure of errors while estimating error for the beta-distributed proportion of TE in the genome. A  
400 hierarchical approach is often called a mixed model in the literature, with cluster-specific effects called  
401 “random”, and sample-wide effects called “fixed”. As different fields apply random and fixed to different  
402 levels of the hierarchy, here we adopt the language of cluster-specific and sample-wide effects (62).  
403 Analyses begin by modelling the proportion of genome as a function of the genome assembly size as a  
404 beta-distributed variable (63):

$$405 \quad y_i \sim \text{Beta}(\mu, \phi)$$

406 In which  $\mu$  is the mean, and  $\phi$  relates to the variance such that:

$$407 \quad \text{var}_{[y]} = \frac{\mu(1-\mu)}{1+\phi}$$

408 Given observations  $Y$ , and covariate assembly size  $X$ :

$$409 \quad \text{logit}(\mu) = \log\left(\frac{\mu}{1-\mu}\right) = \beta X$$

410 Instead of a typical regression, in which observations are presumed to be independent, our  
411 analyses account for the phylogenetic structure of the errors by including normally distributed species-  
412 specific effects with phylogenetic errors (64) such that:

$$413 \quad a \sim N(0, \sigma_a^2 A)$$

414 In which the phylogenetic relationship matrix  $A$  (65) replaces the identity of observations for the  
415 residuals. The same distribution of the response and its phylogenetic errors was applied across all  
416 regressions.

417 Assembly sizes in base pairs were on the order of  $10^9$ . To enable efficient modeling, this  
418 predictor was log10 transformed and then scaled (subtracting the mean and dividing by one standard

419 deviation). No other predictor variables were transformed. Analyses of the association between diet and  
420 TE proportions used diet as a group-specific predictor.

421 To implement Bayesian sampling for these analyses, we used brms (66), a package that enables  
422 coding models in R for implementation in the stan statistical language (67). We ran separate univariate  
423 models for each set of predictors (assembly size, diet, Shannon's Diversity Index, and Pielou's Evenness  
424 Index), with the proportion of TE in the genome as the response. The covariance matrix A was obtained  
425 from the variance covariance matrix of the dated phylogeny (65) of sampled species. Models ran four  
426 separate Markov chain Monte Carlo chains using a Hamiltonian Monte Carlo approach. Compared to  
427 other Bayesian implementations, the HMC approach saves time in sampling parameter spaces by  
428 generating efficient transitions spanning the posterior based on derivatives of the density function of  
429 the model. We used the approach of (68) to estimate  $R^2$  from hierarchical Bayesian models. This  
430 approach divides the variance of the predicted values by the variance of predicted values plus the  
431 expected variance of the errors.

## 432 **References and Notes:**

- 433 1. B. McClintock, The origin and behavior of mutable loci in maize. *Proceedings of the National*  
434 *Academy of Sciences* **36**, 344 (1950).
- 435 2. T. A. Elliott, T. R. Gregory, Do larger genomes contain more diverse transposable elements? *BMC*  
436 *Evolutionary Biology* **15**, 69 (2015).
- 437 3. R. N. Platt, 2nd, M. W. Vandewege, D. A. Ray, Mammalian transposable elements and their  
438 impacts on genome evolution. *Chromosome Res* **26**, 25-43 (2018).
- 439 4. T. H. Eickbush, V. K. Jamburuthugoda, The diversity of retrotransposons and the properties of  
440 their reverse transcriptases. *Virus Res* **134**, 221-234 (2008).
- 441 5. G. Bourque *et al.*, Ten things you should know about transposable elements. *Genome Biology*  
442 **19**, 199 (2018).
- 443 6. V. V. Kapitonov, J. Jurka, Self-synthesizing DNA transposons in eukaryotes. *Proc Natl Acad Sci U S*  
444 *A* **103**, 4540-4545 (2006).
- 445 7. J. Thomas, E. J. Pritham, Helitrons, the Eukaryotic Rolling-circle Transposable Elements.  
446 *Microbiol Spectr* **3**, (2015).
- 447 8. E. J. Pritham, T. Putliwala, C. Feschotte, Mavericks, a novel class of giant transposable elements  
448 widespread in eukaryotes and related to DNA viruses. *Gene* **390**, 3-17 (2007).
- 449 9. A. D. Senft, T. S. Macfarlan, Transposable elements shape the evolution of mammalian  
450 development. *Nature Reviews Genetics*, (2021).

- 451 10. J. Xing *et al.*, Emergence of primate genes by retrotransposon-mediated sequence transduction.  
452 *Proc Natl Acad Sci U S A* **103**, 17608-17613 (2006).
- 453 11. Y. Takata *et al.*, Phytanic acid in dairy products and risk of cancer: current evidence and future  
454 directions. *The FASEB Journal* **31**, 790.737-790.737 (2017).
- 455 12. K. Klai *et al.*, Screening of *Helicoverpa armigera* Mobilome Revealed Transposable Element  
456 Insertions in Insecticide Resistance Genes. *Insects* **11**, 879 (2020).
- 457 13. A. E. v. t. Hof *et al.*, The industrial melanism mutation in British peppered moths is a  
458 transposable element. *Nature* **534**, 102-105 (2016).
- 459 14. C. Gilbert, C. Feschotte, Horizontal acquisition of transposable elements and viral sequences:  
460 patterns and consequences. *Curr Opin Genet Dev* **49**, 15-24 (2018).
- 461 15. I. R. Arkhipova, Neutral Theory, Transposable Elements, and Eukaryotic Genome Evolution.  
462 *Molecular biology and evolution* **35**, 1332-1337 (2018).
- 463 16. R. Kofler, K. A. Senti, V. Nolte, R. Tobler, C. Schlötterer, Molecular dissection of a natural  
464 transposable element invasion. *Genome Res* **28**, 824-835 (2018).
- 465 17. C. Philippe *et al.*, Activation of individual L1 retrotransposon instances is restricted to cell-type  
466 dependent permissive loci. *eLife* **5**, e13926 (2016).
- 467 18. A. Le Rouzic, P. Capy, The first steps of transposable elements invasion: parasitic strategy vs.  
468 genetic drift. *Genetics* **169**, 1033-1043 (2005).
- 469 19. R. N. Platt, II, L. Blanco-Berdugo, D. A. Ray, Accurate Transposable Element Annotation Is Vital  
470 When Analyzing New Genome Assemblies. *Genome Biology and Evolution* **8**, 403-410 (2016).
- 471 20. G. K. C. o. Scientists, Genome 10K: A Proposal to Obtain Whole-Genome Sequence for 10 000  
472 Vertebrate Species. *Journal of Heredity* **100**, 659-674 (2009).
- 473 21. E. C. Teeling *et al.*, Bat Biology, Genomes, and the Bat1K Project: To Generate Chromosome-  
474 Level Genomes for All Living Bat Species. *Annual Review of Animal Biosciences* **6**, 23-46 (2018).
- 475 22. J. Sills *et al.*, Creating a Buzz About Insect Genomes. *Science* **331**, 1386-1386 (2011).
- 476 23. J. Threlfall, M. Blaxter, Launching the Tree of Life Gateway. *Wellcome Open Res* **6**, 125-125  
477 (2021).
- 478 24. D. P. Genereux *et al.*, A comparative genomics multitool for scientific discovery and  
479 conservation. *Nature* **587**, 240-245 (2020).
- 480 25. A. F. Smit, Hubley, R., RepeatModeler Open-1.0. <http://www.repeatmasker.org>, (2008-2015).
- 481 26. A. F. Smit, Hubley, R., Green, P., Repeat-Masker Open-3.0. <http://www.repeatmasker.org>,  
482 (2004).
- 483 27. A. F. Smit, Interspersed repeats and other mementos of transposable elements in mammalian  
484 genomes. *Curr Opin Genet Dev* **9**, 657-663 (1999).
- 485 28. S. Venner, C. Feschotte, C. Biémont, Dynamics of transposable elements: towards a community  
486 ecology of the genome. *Trends in genetics : TIG* **25**, 317-323 (2009).
- 487 29. J. Wang *et al.*, Gigantic Genomes Provide Empirical Tests of Transposable Element Dynamics  
488 Models. *Genomics, Proteomics & Bioinformatics*, (2021).
- 489 30. I. F. Spellerberg, P. J. Fedor, A tribute to Claude Shannon (1916–2001) and a plea for more  
490 rigorous use of species richness, species diversity and the ‘Shannon–Wiener’ Index. *Global*  
491 *Ecology and Biogeography* **12**, 177-179 (2003).
- 492 31. E. C. Pielou, The measurement of diversity in different types of biological collections. *Journal of*  
493 *Theoretical Biology* **13**, 131-144 (1966).
- 494 32. C. Kambayashi *et al.*, Geography-Dependent Horizontal Gene Transfer from Vertebrate  
495 Predators to Their Prey. *Molecular Biology and Evolution* **39**, msac052 (2022).
- 496 33. J. Storer, R. Hubley, J. Rosen, T. J. Wheeler, A. F. Smit, The Dfam community resource of  
497 transposable element families, sequence models, and genome annotations. *Mobile DNA* **12**, 2  
498 (2021).

- 499 34. K. Bachmann, Genome size in mammals. *Chromosoma* **37**, 85-93 (1972).
- 500 35. R. Kofler, Dynamics of Transposable Element Invasions with piRNA Clusters. *Molecular Biology*  
501 *and Evolution* **36**, 1457-1472 (2019).
- 502 36. S. Luo *et al.*, The evolutionary arms race between transposable elements and piRNAs in  
503 *Drosophila melanogaster*. *BMC Evolutionary Biology* **20**, 14 (2020).
- 504 37. D. J. Lampe, M. E. Churchill, H. M. Robertson, A purified mariner transposase is sufficient to  
505 mediate transposition in vitro. *Embo j* **15**, 5470-5479 (1996).
- 506 38. J. Jurka, W. Bao, K. K. Kojima, Families of transposable elements, population structure and the  
507 origin of species. *Biol Direct* **6**, 44 (2011).
- 508 39. W. Bao, K. K. Kojima, O. Kohany, Repbase Update, a database of repetitive elements in  
509 eukaryotic genomes. *Mobile DNA* **6**, 11 (2015).
- 510 40. A. Kapusta, A. Suh, C. Feschotte, Dynamics of genome size evolution in birds and mammals.  
511 *Proceedings of the National Academy of Sciences* **114**, E1460-E1469 (2017).
- 512 41. C. International Human Genome Sequencing, Finishing the euchromatic sequence of the human  
513 genome. *Nature* **431**, 931-945 (2004).
- 514 42. E. F. Kirkness *et al.*, The Dog Genome: Survey Sequencing and Comparative Analysis. *Science*  
515 **301**, 1898-1903 (2003).
- 516 43. R. H. Waterston *et al.*, Initial sequencing and comparative analysis of the mouse genome. *Nature*  
517 **420**, 520-562 (2002).
- 518 44. J. U. Pontius *et al.*, Initial sequence and comparative analysis of the cat genome. *Genome Res* **17**,  
519 1675-1689 (2007).
- 520 45. R. A. Gibbs *et al.*, Genome sequence of the Brown Norway rat yields insights into mammalian  
521 evolution. *Nature* **428**, 493-521 (2004).
- 522 46. M. A. M. Groenen *et al.*, Analyses of pig genomes provide insight into porcine demography and  
523 evolution. *Nature* **491**, 393-398 (2012).
- 524 47. D. L. Adelson, J. M. Raison, M. Garber, R. C. Edgar, Interspersed repeats in the horse (*Equus*  
525 *caballus*); spatial correlations highlight conserved chromosomal domains. *Animal Genetics* **41**,  
526 91-99 (2010).
- 527 48. S. Kumar, S. Subramanian, Mutation rates in mammalian genomes. *Proc Natl Acad Sci U S A* **99**,  
528 803-808 (2002).
- 529 49. A. B. Osmanski, Dávalos, L. M., Johnson, M. G., Hubley, R., Smit, A. F. A., Ray, D. A. ,  
530 Zoonomia\_TEs\_Release\_v1.0.0. [zenodo.org/badge/latestdoi/431231925](https://zenodo.org/badge/latestdoi/431231925), (2022).
- 531 50. R. C. Edgar, MUSCLE: multiple sequence alignment with high accuracy and high throughput.  
532 *Nucleic Acids Res* **32**, 1792-1797 (2004).
- 533 51. S. Capella-Gutiérrez, J. M. Silla-Martínez, T. Gabaldón, trimAl: a tool for automated alignment  
534 trimming in large-scale phylogenetic analyses. *Bioinformatics* **25**, 1972-1973 (2009).
- 535 52. P. Rice, I. Longden, A. Bleasby, EMBOSS: the European Molecular Biology Open Software Suite.  
536 *Trends Genet* **16**, 276-277 (2000).
- 537 53. O. K. Pickeral, W. Makałowski, M. S. Boguski, J. D. Boeke, Frequent human genomic DNA  
538 transduction driven by LINE-1 retrotransposition. *Genome Res* **10**, 411-415 (2000).
- 539 54. J. L. Goodier, E. M. Ostertag, H. H. Kazazian Jr, Transduction of 3'-flanking sequences is common  
540 in L1 retrotransposition. *Human Molecular Genetics* **9**, 653-657 (2000).
- 541 55. C. Esnault, J. Maestre, T. Heidmann, Human LINE retrotransposons generate processed  
542 pseudogenes. *Nature Genetics* **24**, 363-367 (2000).
- 543 56. C. R. Beck, J. L. Garcia-Perez, R. M. Badge, J. V. Moran, LINE-1 elements in structural variation  
544 and disease. *Annu Rev Genomics Hum Genet* **12**, 187-215 (2011).
- 545 57. M. El-Sawy, P. Deininger, Tandem insertions of Alu elements. *Cytogenet Genome Res* **108**, 58-62  
546 (2005).

- 547 58. J. Ma, K. M. Devos, J. L. Bennetzen, Analyses of LTR-retrotransposon structures reveal recent  
548 and rapid genomic DNA loss in rice. *Genome Res* **14**, 860-869 (2004).
- 549 59. G. Abrusán, N. Grundmann, L. DeMester, W. Makalowski, TEclass—a tool for automated  
550 classification of unknown eukaryotic transposable elements. *Bioinformatics* **25**, 1329-1330  
551 (2009).
- 552 60. L. L. P. Legendre, *Numerical Ecology, Volume 24, 3rd Edition*. (Elsevier, Oxford, UK, 2012).
- 553 61. C. J. F. ter Braak, and Šmilauer, P., *Canoco reference manual and user's guide: software for*  
554 *ordination, version 5.0*. (Microcomputer Power, Ithaca, USA, 2012).
- 555 62. A. Gelman, Analysis of variance - Why it is more important than ever. *Annals of Statistics* **33**, 1-  
556 31 (2005).
- 557 63. J. C. Douma, J. T. Weedon, Analysing continuous proportions in ecology and evolution: A  
558 practical introduction to beta and Dirichlet regression. *Methods in Ecology and Evolution* **10**,  
559 1412-1430 (2019).
- 560 64. J. D. Hadfield, S. Nakagawa, General quantitative genetic methods for comparative biology:  
561 phylogenies, taxonomies and multi-trait models for continuous and categorical characters. *J Evol*  
562 *Biol* **23**, 494-508 (2010).
- 563 65. V. C. M. Nicole M. Foley, Andrew J. Harris, Kevin R. Bredemeyer, Joana Damas, Harris A. Lewin,  
564 Eduardo Eizirik, John Gatesy, Zoonomia Consortium, Mark S. Springer, William J. Murphy, A  
565 genomic timescale for placental mammal evolution. *Science*, (2021).
- 566 66. P.-C. Bürkner, brms: An R Package for Bayesian Multilevel Models Using Stan. *Journal of*  
567 *Statistical Software* **80**, 1-28 (2017).
- 568 67. B. Carpenter *et al.*, Stan: A Probabilistic Programming Language. *2017* **76**, 32 (2017).
- 569 68. A. Gelman, B. Goodrich, J. Gabry, A. Vehtari, R-squared for Bayesian Regression Models. *The*  
570 *American Statistician* **73**, 307-309 (2019).

571

## 572 **Acknowledgements:**

573 We thank the High-Performance Computing Center at Texas Tech University for providing  
574 compute resources and technical support throughout the project. This work was also made  
575 possible by the SeaWulf computing system from Stony Brook Research Computing and  
576 Cyberinfrastructure, and the Institute for Advanced Computational Science at Stony Brook  
577 University funded by National Science Foundation-OAC 1531492. We also thank Brittany Ann  
578 Hale for providing artistic renditions of mammal taxa for our figure.

579 **Funding:** This project was partially supported by

580 National Science Foundation grant DEB 1838283 (DDMS, DAR)

581 National Science Foundation grant IOS 2032006 (DDMS, DAR)

582 National Institutes of Health grant R01HG002939 (JMS, RH, AS, JebR)

583 National Institutes of Health grant U24HG010136 (JMS, RH, AS, JebR)

584 National Science Foundation grant DEB 1838273 (LMD)

585 National Science Foundation grant DGE 1633299 (LMD)

586 National Institutes of Health NHGRI R01HG008742 (ZC)

587 Swedish Research Council Distinguished Professor Award (ZC)

588 **Author contributions:**

589 Conceptualization: ABO, DAR

590 Assembly generation: DDMS, LMD, DAR

591 Library validation & curation: NSP, JMS, ABO, KAMS, JK, JRG, MH, CG, CC, JR, JebR, RH,

592 AS, DAR

593 Methodology & Investigation: ABO, LMD, NSP, DAR

594 Writing – original draft: ABO NSP, DAR, RDS, LMD

595 Writing – review & editing: ABO, NSP, DAR, JMS, AS, RDS, LMD

596 **Competing interests:** Authors declare no competing interests.

597 **Data and materials availability:** All assemblies are available in Genbank, TE consensus

598 sequences are available via the Dfam database. All other data is available in the supplementary

599 materials; code used in the analysis is available at (49). .

600 **Zoonomia Consortium List:**

601 Gregory Andrews<sup>1</sup>, Joel C. Armstrong<sup>2</sup>, Matteo Bianchi<sup>3</sup>, Bruce W. Birren<sup>4</sup>, Kevin R.  
602 Bredemeyer<sup>5</sup>, Ana M. Breit<sup>6</sup>, Matthew J. Christmas<sup>3</sup>, Hiram Clawson<sup>2</sup>, Joana Damas<sup>7</sup>, Federica  
603 Di Palma<sup>8,9</sup>, Mark Diekhans<sup>2</sup>, Michael X. Dong<sup>3</sup>, Eduardo Eizirik<sup>10</sup>, Kaili Fan<sup>1</sup>, Cornelia  
604 Fanter<sup>11</sup>, Nicole M. Foley<sup>5</sup>, Karin Forsberg-Nilsson<sup>12,13</sup>, Carlos J. Garcia<sup>14</sup>, John Gatesy<sup>15</sup>, Steven  
605 Gazal<sup>16</sup>, Diane P. Genereux<sup>4</sup>, Linda Goodman<sup>17</sup>, Jenna Grimshaw<sup>14</sup>, Michaela K. Halsey<sup>14</sup>,  
606 Andrew J. Harris<sup>5</sup>, Glenn Hickey<sup>18</sup>, Michael Hiller<sup>19,20,21</sup>, Allyson G. Hindle<sup>11</sup>, Robert M.  
607 Hubley<sup>22</sup>, Graham M. Hughes<sup>23</sup>, Jeremy Johnson<sup>4</sup>, David Juan<sup>24</sup>, Irene M. Kaplow<sup>25,26</sup>, Elinor K.  
608 Karlsson<sup>1,4,27</sup>, Kathleen C. Keough<sup>17,28,29</sup>, Bogdan Kirilenko<sup>19,20,21</sup>, Klaus-Peter Koepfli<sup>30,31,32</sup>,  
609 Jennifer M. Korstian<sup>14</sup>, Amanda Kowalczyk<sup>25,26</sup>, Sergey V. Kozyrev<sup>3</sup>, Alyssa J. Lawler<sup>4,26,33</sup>,  
610 Colleen Lawless<sup>23</sup>, Thomas Lehmann<sup>34</sup>, Danielle L. Levesque<sup>6</sup>, Harris A. Lewin<sup>7,35,36</sup>, Xue  
611 Li<sup>1,4,37</sup>, Abigail Lind<sup>28,29</sup>, Kerstin Lindblad-Toh<sup>3,4</sup>, Ava Mackay-Smith<sup>38</sup>, Voichita D.  
612 Marinescu<sup>3</sup>, Tomas Marques-Bonet<sup>39,40,41,42</sup>, Victor C. Mason<sup>43</sup>, Jennifer R. S. Meadows<sup>3</sup>, Wynn  
613 K. Meyer<sup>44</sup>, Jill E. Moore<sup>1</sup>, Lucas R. Moreira<sup>1,4</sup>, Diana D. Moreno-Santillan<sup>14</sup>, Kathleen M.  
614 Morrill<sup>1,4,37</sup>, Gerard Muntané<sup>24</sup>, William J. Murphy<sup>5</sup>, Arcadi Navarro<sup>39,41,45,46</sup>, Martin



615 Nweeia<sup>47,48,49,50</sup>, Sylvia Ortmann<sup>51</sup>, Austin Osmanski<sup>14</sup>, Benedict Paten<sup>2</sup>, Nicole S. Paulat<sup>14</sup>,  
616 Andreas R. Pfenning<sup>25,26</sup>, BaDoi N. Phan<sup>25,26,52</sup>, Katherine S. Pollard<sup>28,29,53</sup>, Henry E. Pratt<sup>1</sup>,  
617 David A. Ray<sup>14</sup>, Steven K. Reilly<sup>38</sup>, Jeb R. Rosen<sup>22</sup>, Irina Ruf<sup>54</sup>, Louise Ryan<sup>23</sup>, Oliver A.  
618 Ryder<sup>55,56</sup>, Pardis C. Sabeti<sup>4,57,58</sup>, Daniel E. Schäffer<sup>25</sup>, Aitor Serres<sup>24</sup>, Beth Shapiro<sup>59,60</sup>, Arian F.  
619 A. Smit<sup>22</sup>, Mark Springer<sup>61</sup>, Chaitanya Srinivasan<sup>25</sup>, Cynthia Steiner<sup>55</sup>, Jessica M. Storer<sup>22</sup>, Kevin  
620 A. M. Sullivan<sup>14</sup>, Patrick F. Sullivan<sup>62,63</sup>, Elisabeth Sundström<sup>3</sup>, Megan A. Supple<sup>59</sup>, Ross  
621 Swofford<sup>4</sup>, Joy-El Talbot<sup>64</sup>, Emma Teeling<sup>23</sup>, Jason Turner-Maier<sup>4</sup>, Alejandro Valenzuela<sup>24</sup>,  
622 Franziska Wagner<sup>65</sup>, Ola Wallerman<sup>3</sup>, Chao Wang<sup>3</sup>, Juehan Wang<sup>16</sup>, Zhiping Weng<sup>1</sup>, Aryn P.  
623 Wilder<sup>55</sup>, Morgan E. Wirthlin<sup>25,26,66</sup>, James R. Xue<sup>4,57</sup>, Xiaomeng Zhang<sup>4,25,26</sup>

624

625 Affiliations:

626 <sup>1</sup>Program in Bioinformatics and Integrative Biology, UMass Chan Medical School; Worcester,  
627 MA 01605, USA.

628 <sup>2</sup>Genomics Institute, University of California Santa Cruz; Santa Cruz, CA 95064, USA.

629 <sup>3</sup>Department of Medical Biochemistry and Microbiology, Science for Life Laboratory, Uppsala  
630 University; Uppsala, 751 32, Sweden.

631 <sup>4</sup>Broad Institute of MIT and Harvard; Cambridge, MA 02139, USA.

632 <sup>5</sup>Veterinary Integrative Biosciences, Texas A&M University; College Station, TX 77843, USA.

633 <sup>6</sup>School of Biology and Ecology, University of Maine; Orono, ME 04469, USA.

634 <sup>7</sup>The Genome Center, University of California Davis; Davis, CA 95616, USA.

635 <sup>8</sup>Genome British Columbia; Vancouver, BC, Canada.

636 <sup>9</sup>School of Biological Sciences, University of East Anglia; Norwich, UK.

637 <sup>10</sup>School of Health and Life Sciences, Pontifical Catholic University of Rio Grande do Sul; Porto  
638 Alegre, 90619-900, Brazil.

639 <sup>11</sup>School of Life Sciences, University of Nevada Las Vegas; Las Vegas, NV 89154, USA.

640 <sup>12</sup>Biodiscovery Institute, University of Nottingham; Nottingham, UK.

641 <sup>13</sup>Department of Immunology, Genetics and Pathology, Science for Life Laboratory, Uppsala  
642 University; Uppsala, 751 85, Sweden.

643 <sup>14</sup>Department of Biological Sciences, Texas Tech University; Lubbock, TX 79409, USA.

644 <sup>15</sup>Division of Vertebrate Zoology, American Museum of Natural History; New York, NY 10024,  
645 USA.

646 <sup>16</sup>Keck School of Medicine, University of Southern California; Los Angeles, CA 90033, USA.

647 <sup>17</sup>Fauna Bio Incorporated; Emeryville, CA 94608, USA.

648 <sup>18</sup>Baskin School of Engineering, University of California Santa Cruz; Santa Cruz, CA 95064,  
649 USA.

650 <sup>19</sup>Faculty of Biosciences, Goethe-University; 60438 Frankfurt, Germany.

651 <sup>20</sup>LOEWE Centre for Translational Biodiversity Genomics; 60325 Frankfurt, Germany.

652 <sup>21</sup>Senckenberg Research Institute; 60325 Frankfurt, Germany.

653 <sup>22</sup>Institute for Systems Biology; Seattle, WA 98109, USA.

654 <sup>23</sup>School of Biology and Environmental Science, University College Dublin; Belfield, Dublin 4,  
655 Ireland.

656 <sup>24</sup>Department of Experimental and Health Sciences, Institute of Evolutionary Biology (UPF-  
657 CSIC), Universitat Pompeu Fabra; Barcelona, 08003, Spain.

658 <sup>25</sup>Department of Computational Biology, School of Computer Science, Carnegie Mellon  
659 University; Pittsburgh, PA 15213, USA.

660 <sup>26</sup>Neuroscience Institute, Carnegie Mellon University; Pittsburgh, PA 15213, USA.



- 661 <sup>27</sup>Program in Molecular Medicine, UMass Chan Medical School; Worcester, MA 01605, USA.  
662 <sup>28</sup>Department of Epidemiology & Biostatistics, University of California San Francisco; San  
663 Francisco, CA 94158, USA.  
664 <sup>29</sup>Gladstone Institutes; San Francisco, CA 94158, USA.  
665 <sup>30</sup>Center for Species Survival, Smithsonian's National Zoo and Conservation Biology Institute;  
666 Washington, DC 20008, USA.  
667 <sup>31</sup>Computer Technologies Laboratory, ITMO University; St. Petersburg 197101, Russia.  
668 <sup>32</sup>Smithsonian-Mason School of Conservation, George Mason University; Front Royal, VA  
669 22630, USA.  
670 <sup>33</sup>Department of Biological Sciences, Mellon College of Science, Carnegie Mellon University;  
671 Pittsburgh, PA 15213, USA.  
672 <sup>34</sup>Senckenberg Research Institute and Natural History Museum Frankfurt; 60325 Frankfurt am  
673 Main, Germany.  
674 <sup>35</sup>Department of Evolution and Ecology, University of California Davis; Davis, CA 95616, USA.  
675 <sup>36</sup>John Muir Institute for the Environment, University of California Davis; Davis, CA 95616,  
676 USA.  
677 <sup>37</sup>Morningside Graduate School of Biomedical Sciences, UMass Chan Medical School;  
678 Worcester, MA 01605, USA.  
679 <sup>38</sup>Department of Genetics, Yale School of Medicine; New Haven, CT 06510, USA.  
680 <sup>39</sup>Catalan Institution of Research and Advanced Studies (ICREA); Barcelona, 08010, Spain.  
681 <sup>40</sup>CNAG-CRG, Centre for Genomic Regulation, Barcelona Institute of Science and Technology  
682 (BIST); Barcelona, 08036, Spain.  
683 <sup>41</sup>Department of Medicine and Life Sciences, Institute of Evolutionary Biology (UPF-CSIC),  
684 Universitat Pompeu Fabra; Barcelona, 08003, Spain.  
685 <sup>42</sup>Institut Català de Paleontologia Miquel Crusafont, Universitat Autònoma de Barcelona; 08193,  
686 Cerdanyola del Vallès, Barcelona, Spain.  
687 <sup>43</sup>Institute of Cell Biology, University of Bern; 3012, Bern, Switzerland.  
688 <sup>44</sup>Department of Biological Sciences, Lehigh University; Bethlehem, PA 18015, USA.  
689 <sup>45</sup>BarcelonaBeta Brain Research Center, Pasqual Maragall Foundation; Barcelona, 08005, Spain.  
690 <sup>46</sup>CRG, Centre for Genomic Regulation, Barcelona Institute of Science and Technology (BIST);  
691 Barcelona, 08003, Spain.  
692 <sup>47</sup>Department of Comprehensive Care, School of Dental Medicine, Case Western Reserve  
693 University; Cleveland, OH 44106, USA.  
694 <sup>48</sup>Department of Vertebrate Zoology, Canadian Museum of Nature; Ottawa, Ontario K2P 2R1,  
695 Canada.  
696 <sup>49</sup>Department of Vertebrate Zoology, Smithsonian Institution; Washington, DC 20002, USA.  
697 <sup>50</sup>Narwhal Genome Initiative, Department of Restorative Dentistry and Biomaterials Sciences,  
698 Harvard School of Dental Medicine; Boston, MA 02115, USA.  
699 <sup>51</sup>Department of Evolutionary Ecology, Leibniz Institute for Zoo and Wildlife Research; 10315  
700 Berlin, Germany.  
701 <sup>52</sup>Medical Scientist Training Program, University of Pittsburgh School of Medicine; Pittsburgh,  
702 PA 15261, USA.  
703 <sup>53</sup>Chan Zuckerberg Biohub; San Francisco, CA 94158, USA.  
704 <sup>54</sup>Division of Messel Research and Mammalogy, Senckenberg Research Institute and Natural  
705 History Museum Frankfurt; 60325 Frankfurt am Main, Germany.  
706 <sup>55</sup>Conservation Genetics, San Diego Zoo Wildlife Alliance; Escondido, CA 92027, USA.

707 <sup>56</sup>Department of Evolution, Behavior and Ecology, School of Biological Sciences, University of  
708 California San Diego; La Jolla, CA 92039, USA.

709 <sup>57</sup>Department of Organismic and Evolutionary Biology, Harvard University; Cambridge, MA  
710 02138, USA.

711 <sup>58</sup>Howard Hughes Medical Institute; Chevy Chase, MD, USA.

712 <sup>59</sup>Department of Ecology and Evolutionary Biology, University of California Santa Cruz; Santa  
713 Cruz, CA 95064, USA.

714 <sup>60</sup>Howard Hughes Medical Institute, University of California Santa Cruz; Santa Cruz, CA 95064,  
715 USA.

716 <sup>61</sup>Department of Evolution, Ecology and Organismal Biology, University of California  
717 Riverside; Riverside, CA 92521, USA.

718 <sup>62</sup>Department of Genetics, University of North Carolina Medical School; Chapel Hill, NC 27599,  
719 USA.

720 <sup>63</sup>Department of Medical Epidemiology and Biostatistics, Karolinska Institutet; Stockholm,  
721 Sweden.

722 <sup>64</sup>Iris Data Solutions, LLC; Orono, ME 04473, USA.

723 <sup>65</sup>Museum of Zoology, Senckenberg Natural History Collections Dresden; 01109 Dresden,  
724 Germany.

725 <sup>66</sup>Allen Institute for Brain Science; Seattle, WA 98109, USA

726

727

728

## 729 **Supplementary Materials**

730 Figs. S1-S5

731 Tables S1-S8

732

## 733 **Figure legends**

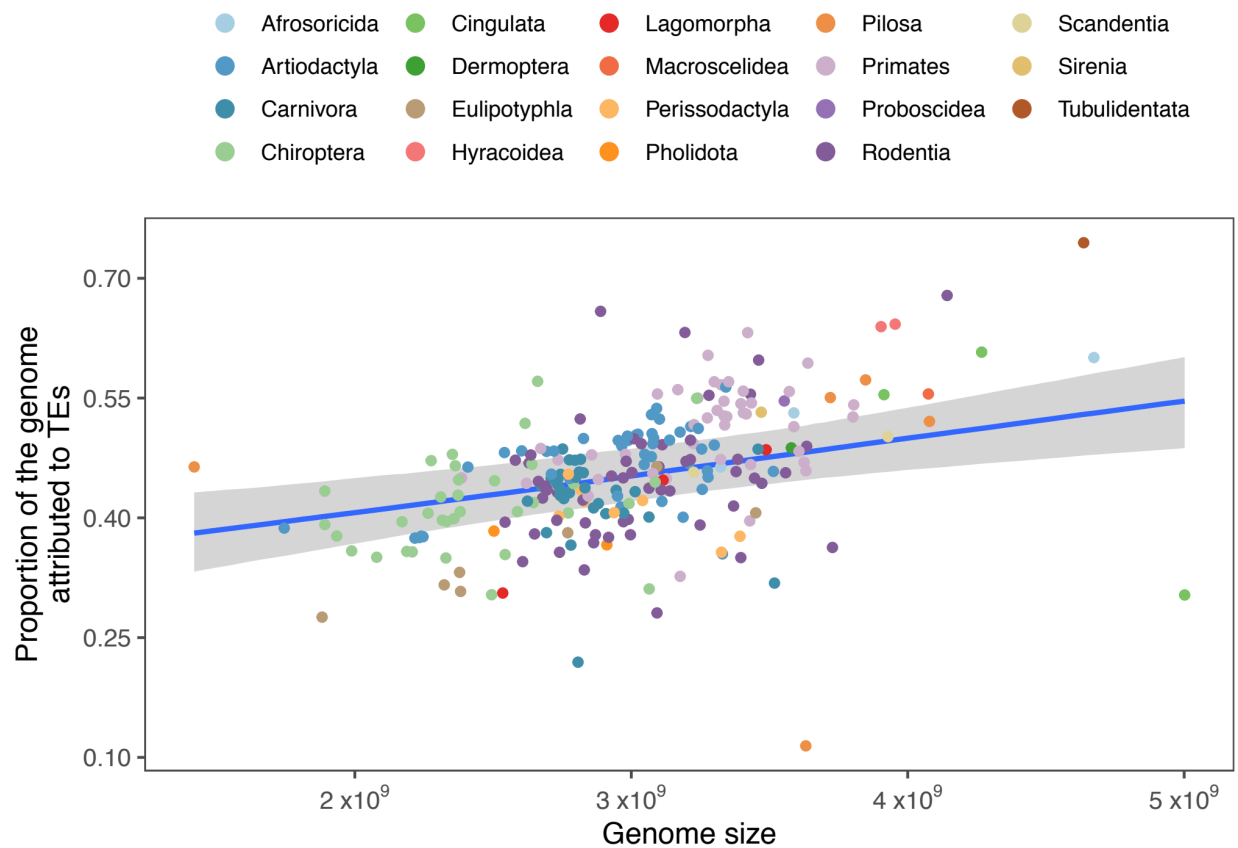

734

735 **Fig. 1. Correlation of total genomic TE content and the size, in base pairs, of the genome.**

736 Due to the log transformation and scaling of assembly size for the hierarchical Bayesian analysis,  
737 and resulting back-transformation, the x-axis values are approximately rendered. Blue line  
738 indicates the line of best-fit and shaded area is the 95% high probability density of the fit. The  $r^2$   
739 for this relationship was estimated at 0.54 (95% high probability density 0.42, 0.64).

740

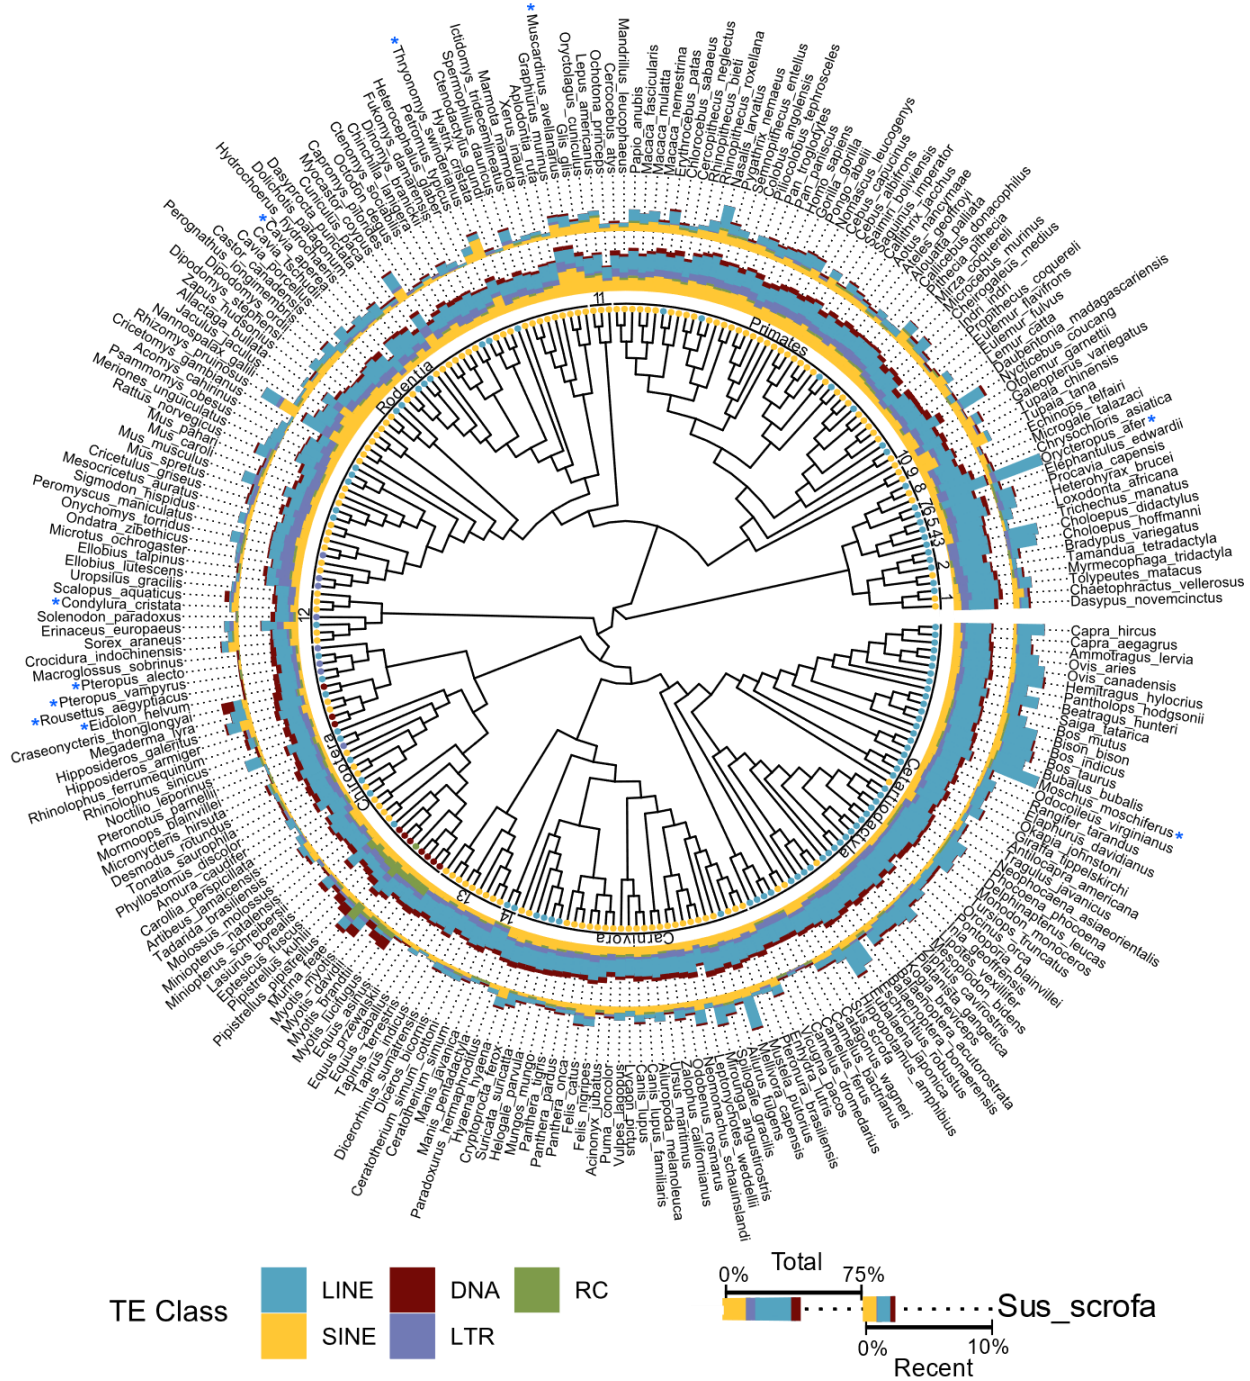

741

742 **Fig. 2. Total and young TE genomic proportions by species within a phylogenetic context.**

743 Dots at branch tips indicate the TE class most prevalent among recent TE insertions (insertions

744 with <4% divergence from the relevant consensus TE). The ring immediately following the

745 branch tip dots indicates the mammalian order to reach respective species. Orders represented

746 by numbers include: 1) Cingulata, 2) Pilosa, 3) Sirenia, 4) Proboscidea, 5) Hyracoidea, 6)

747 Macroscelidea, 7) Tubulidentata, 8) Afrosoricida, 9) Scandentia, 10) Dermoptera, 11)

748 Lagomorpha, 12) Eulipotyphla, 13) Perissodactyla, 14) Pholidota. The inner ring of stacked-bar  
 749 data depicts the total percentage of the genome attributed to the five main categories of TEs:  
 750 DNA transposons, LINES, SINEs, LTRs, & Helitrons. The outer ring of stacked-bar data shows  
 751 the percentage of the genome derived from recently inserted TEs. Cladogram adapted from (65).  
 752

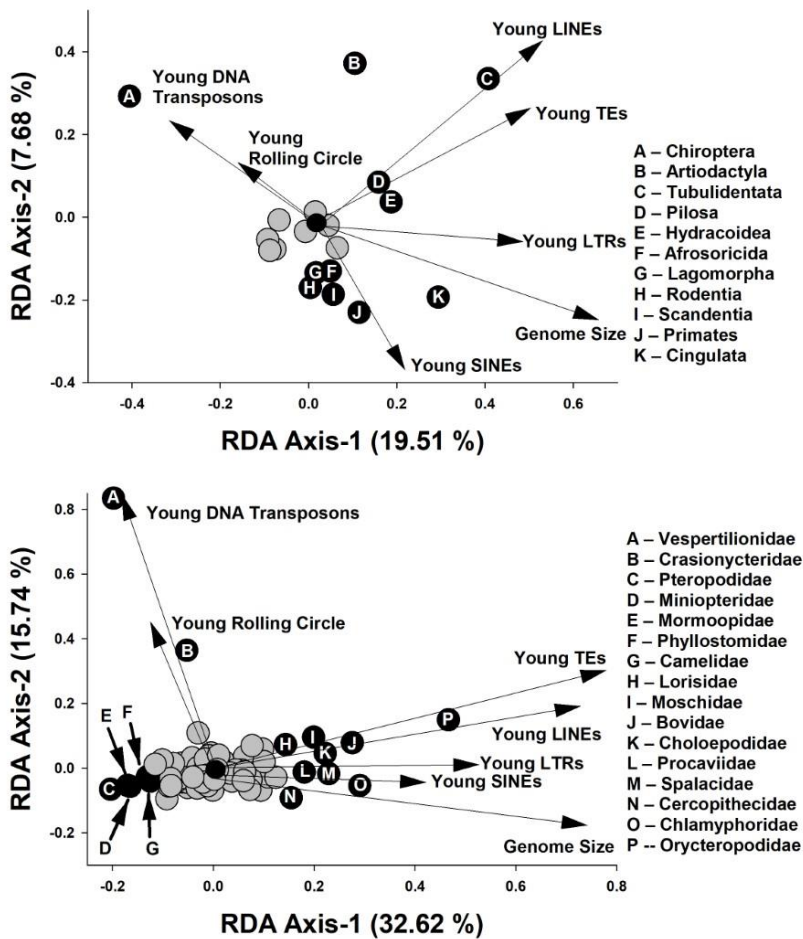

753  
 754 **Fig. 3. Redundancy analyses examining major axes of variation in TE accumulation and**  
 755 **genome size related to orders (above) and families (below) of mammals.** Arrows represent  
 756 significant correlations TE types with the first two RDA axes. Each axis reflects changes in TE  
 757 composition related to ordinal (above) or familial (below) affiliation of taxa used in analyses.  
 758 Gray circles represent orders or families that were not significantly correlated to at least one of  
 759 the RDA axes whereas black circles represent orders or families with significant correlations.



760

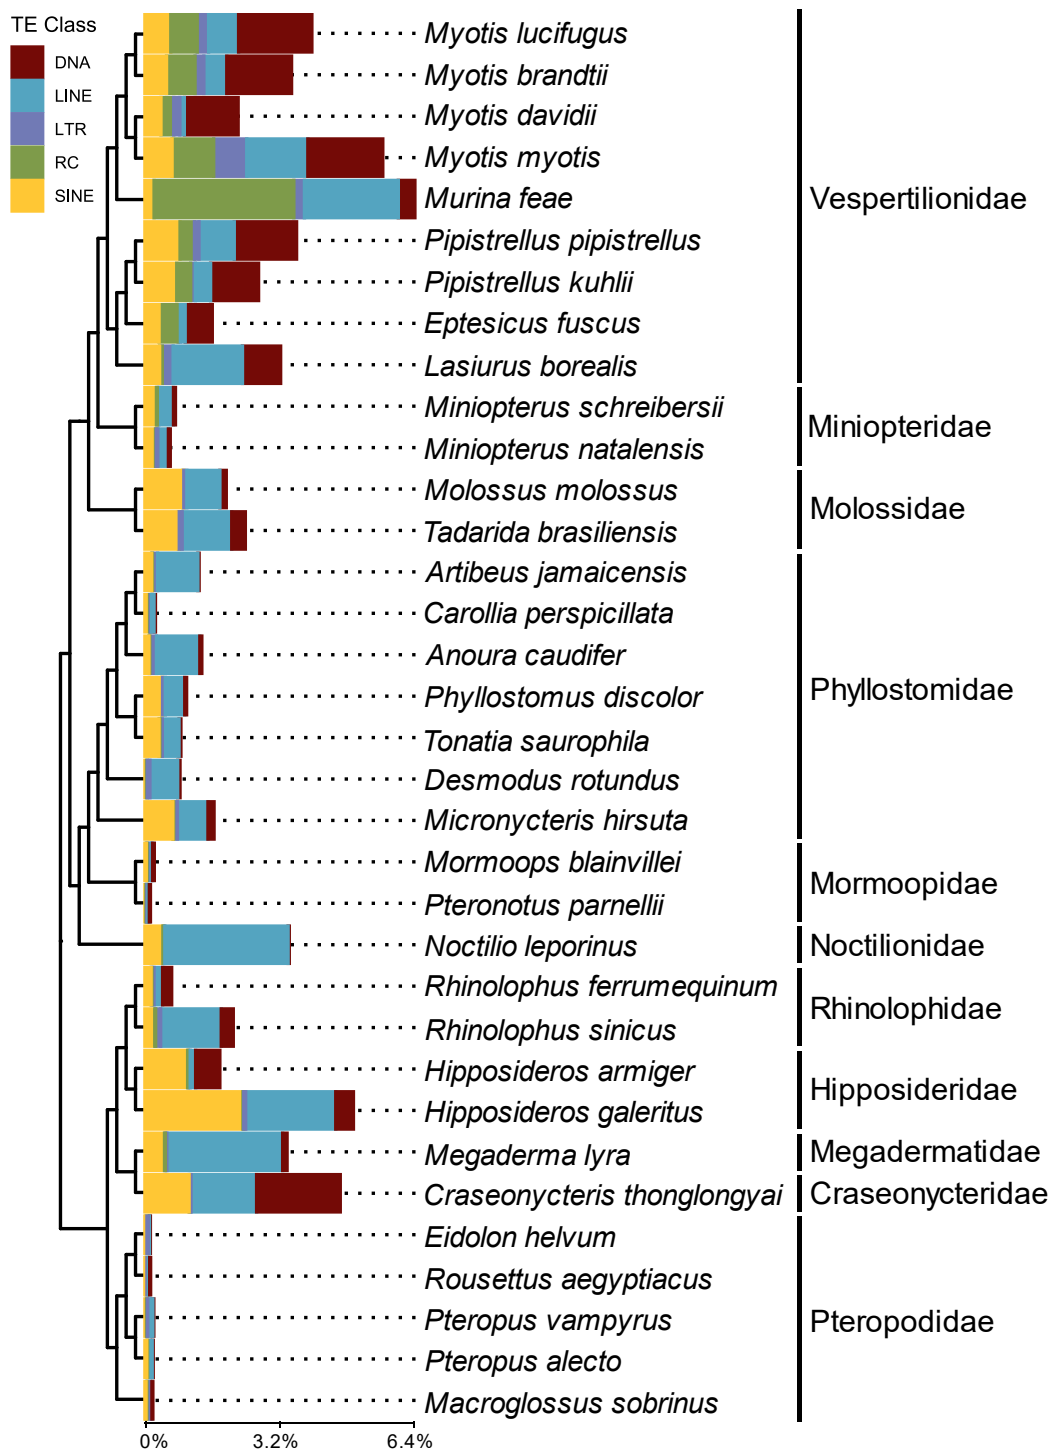

761

762 **Fig. 4. Stacked bar charts depicting proportions of recently accumulated TEs (<4% kimura**  
 763 **from consensus TE) in bats.** Data is organized by TE classification and plotted onto the tips of  
 764 the chiropteran portion of the mammalian tree, adapted from (65).

765

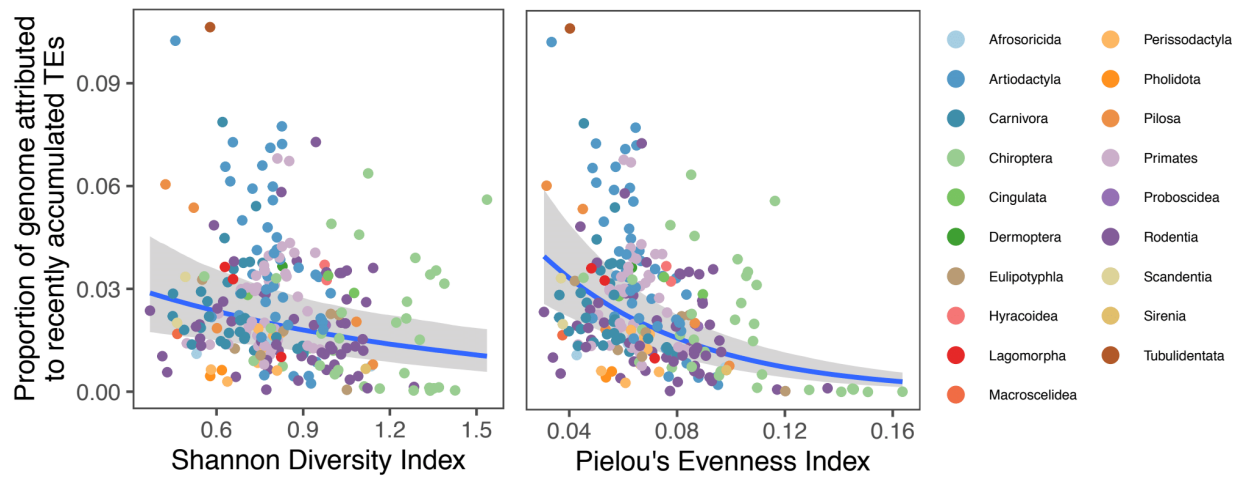

766

767 **Fig. 5. Recent mammalian TE diversity in relation to Shannon  $H$  (left) and Pielou's  $J$**   
768 **(right).** Blue line indicates the line of best-fit and shaded area is the 95% high probability  
769 density of the fit. The  $r^2$  for  $H$  was estimated at 0.67 (95% high probability density 0.52, 0.78),  
770 and for  $J$  it was 0.69 (95% high probability density 0.56, 0.79).

771

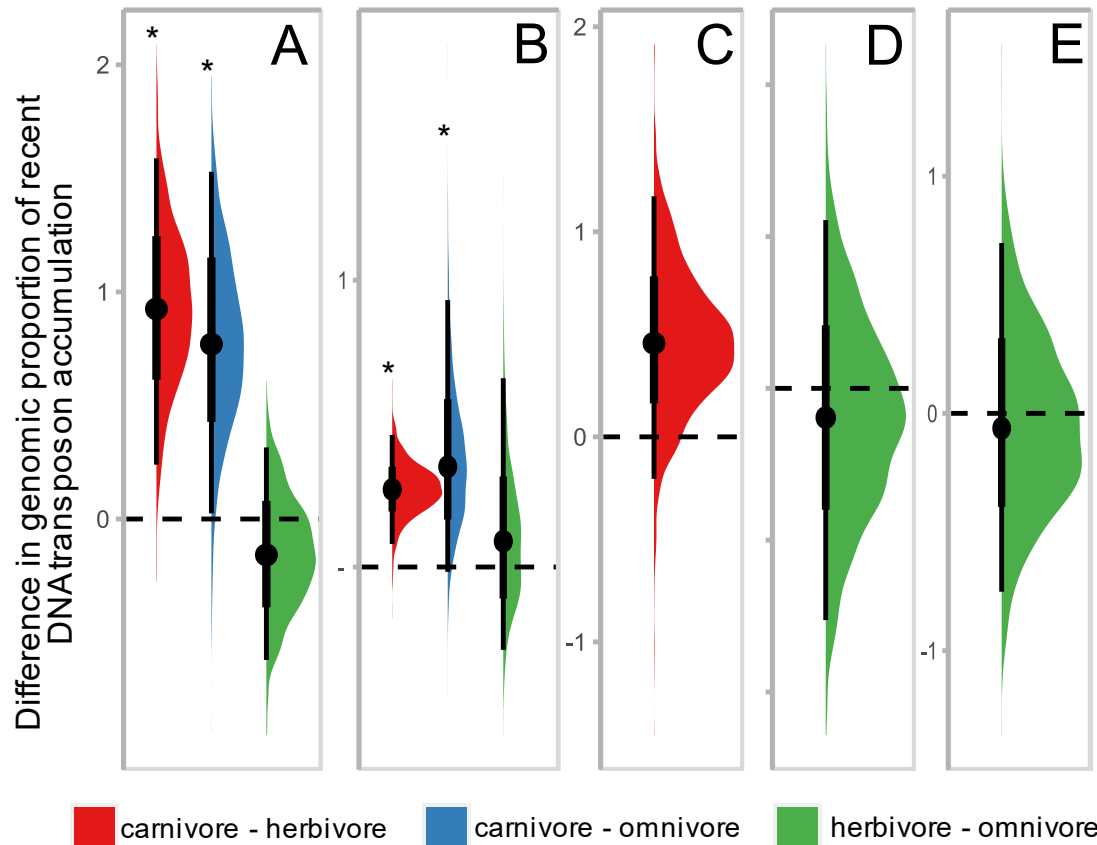

**Fig 6. Half eye plots depicting fold differences in recent DNA transposon accumulation among three dietary phenotypes: carnivore, herbivore, and omnivore.** Instead of showing the estimated values for each of the diets, these plots depict the fold ratio between each diet pair, so that the plot itself shows statistical significance. Comparisons for which the thin line does not overlap with 1 are significant, indicated by \*. Plots correspond to the following taxonomic groups: A) placental mammals ( $r^2$  estimated at 0.92 (95% high probability density 0.79, 0.97)), B) Artiodactyla ( $r^2$  estimated at 0.64 (95% high probability density 0.32, 0.78)), C) Chiroptera ( $r^2$  estimated at 0.34 (95% high probability density 0.02, 0.86)), D) Primates ( $r^2$  estimated at 0.18 (95% high probability density 0.00, 0.58)), E) Rodentia ( $r^2$  estimated at 0.07 (95% high probability density 0.00, 0.28)).
